# Supplementary material for: RNA-Seq Analysis of Trans-Differentiated ARPE-19 Cells Transduced by AAV9-AIPL1 Vectors
Source: MDPI journal article supplement (doi:10.3390/ijms25010197), 2023-12-22
Supplement: s1 [file s1]

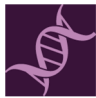

## Supplementary materials

>ATGGACGCCGCTCTGCTGCTGAATGTGGAAGGCGTGAAAAAGACCATCCTGCACGGTGGAACAGGCGAGCTGCCTAACTTCATCACCGG  
CTCCAGAGTGATCTTCCACTTCCGGACCATGAAGTGCGACGAAGAGAGAACCGTGATTGACGATAGCAGACAGGTGGGCCAGCCTATGCA  
CATCATCATCGGCAACATGTTTAAGCTGGAGGTCTGGGAAATCCTGCTGACCAGCATGAGAGTGCATGAAGTTGCCGAGTTCTGGTGCGAT  
ACAATCCACACAGGAGTGTAACCTATCCTGTCTAGAAGCCTGAGACAGATGGCCCAGGGAAAGGACCCACAGAATGGCACGTGCATAC  
CTGCGGCCTGGCCAATATGTTTCGCTTACCACACCCTGGGATACGAGGACCTGGATGAGCTTCAGAAGGAGCCACAGCCTCTGGTCTTTGTG  
ATCGAGCTGCTTCAAGTGACGCCCCCTAGCGACTACCAGCGGGAACCTGGAACCTGAGCAACCACGAAAAGATGAAAGCTGTGCCTGT  
GCTGCACGGCGAAGGCAATCGGCTGTTCAAACCTGGGCAGATACGAGGAGGCCAGCAGCAAGTACCAGGAGGCCATCATTGTTTGCGCA  
ACCTGCAGACCAAGGAAAAACCTTGGGAGGTGCAGTGGCTGAAGCTGGAGAAGATGATCAACACCCTGATCCTGAACTACTGCCAGTGT  
CTGCTGAAGAAAGAGGAGTACTACGAGGTCTGGAGCACACATCTGACATCCTGAGACACCACCCCGGCATCGTGAAGGCCTATTACGTG  
CGGGCCCGGGCCACGCCGAAGTGTGGAACGAGGCCGAGGCCAAGGCGGACCTCCAGAAAGTGTGGAGCTGGAGCCGTCCATGCAGA  
AGGCGGTGCGCAGGGAGCTGAGGCTGCTGGAGAACC GCATGGCGGAGAAGCAGGAGGAGGAGCGGCTGCGCTGCCGGAACATGCTGAG  
CCAGGTGCCACGCAGCCTCCCGCAGAGCCACCCACAGAGCCACCCGCACAGTCATCCACAGAGCCACCTGCAGAGCCACCCACAGCAC  
CATCTGCAGAGCTGTCCGCAGGGCCCCCTGCAGAGCCAGCCACAGAGCCACCCCGTCCCCAGGGCACTCGCTGCAGCACTAATGA\*

**Supplementary Figure S1.** AIPL1 codon-optimized sequence

**Supplementary Table S1.** List of marker genes and qPCR primers.

| Gene                                                           | Forward primer                    | Reverse primer                            | Fluorescence Probe                                                                   |
|----------------------------------------------------------------|-----------------------------------|-------------------------------------------|--------------------------------------------------------------------------------------|
| PPIA                                                           | 5'-ATGCTGGACCCAACACAAAT<br>-3'    | 5'-TCTTTCACCTTTGCCAAACACC<br>-3'          | 5'-HEX-CATCTGCACTGCCAAGAC<br>-BHQ1-3'                                                |
| GAPDH                                                          | 5'-<br>AGCCACATCGCTCAGACAC<br>-3' | 5'-<br>GCCCAATACGACCAATCC<br>-3'          | 5'-            HEX            -GGAAGGTGAAGGTCGGAG<br>-BHQ1-3'                        |
| TBP                                                            | 5'-TTGGGTTTTCAGCTAAGTTCT-3'       | 5'-CCAGGAAATAACTCTGGCTCA<br>-3'           | 5'-            HEX            -AGCTGTGATGTGAAGTTCC<br>-BHQ1-3'                       |
| <b>Retinal markers</b>                                         |                                   |                                           |                                                                                      |
| RPE65                                                          | 5'- ACTTCTCCTTTCAACCTCTTCC-3'     | 5'- TTTTCACCTCTCCAGTTCTC-3'               | 5'- FAM - AATGGGTTTCTGATTGTGGATCTCTGCT-<br>BHQ1-3'                                   |
| RDH12                                                          | 5'-GCCTATTGCCACAGCAAGC-3'         | 5'-GCAGAGCAGGGAGGAGTG-3'                  | 5'- FAM - GTCACCACCTACGCAGTGCACCCAG-<br>BHQ1-3'                                      |
| <b>Photoreceptor markers</b>                                   |                                   |                                           |                                                                                      |
| ARR3                                                           | 5'- GAAACGGGACTTCGTGGACCATG-3'    | 5'- CGGCCATAGCGAAAGGCAC-3'                | 5'- FAM - CCAGGACAACACCGTCAATGGGTCC-BHQ1-3'                                          |
| CRX                                                            | 5'-<br>TGTTGCCAAGACCCAGTAC-3'     | 5'-<br>ATTTAGCCCTCCGGTTCTTG-3'            | 5'- FAM - TCAGGCAGATTGATCTTCAGAGCCAC-<br>BHQ1-3'                                     |
| CRB1                                                           | 5'- TGTGCCAGGACTTACTCAAC-3'       | 5'- AGCAAGAGGATCAGTAACAAGG-<br>3'         | 5'- FAM - CAGCAAAGGCAACATCACAGAGGC-BHQ1-<br>3'                                       |
| PDE6B                                                          | 5'- ACTCCGAGATCGTCTTCCAC-3'       | 5'- CCACGACGTCTTGCCATTC-3'                | 5'- FAM - CTCATTGCTGACGAGCTCACTGACTAC-<br>BHQ1-3'                                    |
| TULP1                                                          | 5'- GCCAATTACCTCATCTCCATCG-3'     | 5'- ACATTAGTGCTGTACCCACG-3'               | 5'- FAM- TTCTGCCCGTTGTCAAAGACCGT-BHQ1-3'                                             |
| GUCY2D                                                         | 5'- CCTGCTCAACGATCTCTACAC-3'      | 5'- TGACATGTTGGCGATCTCTG-3'               | 5'- FAM- AGGCGTCCCCTATTGTCTCCACT-BHQ1-3'                                             |
| <b>Neuronal markers</b>                                        |                                   |                                           |                                                                                      |
| OPN3                                                           | 5'- GCTTACTCACTGGCGTGG-3'         | 5'- AGGAGGAATCGTTGGCATC-3'                | 5'- FAM- CTGGACGTACACGGACTAGGCTGC-BHQ1-<br>3'                                        |
| TUBB3                                                          | 5'- GGGCCAAGTTCTGGGAAGTC-3'       | 5'- CGAGTCGCCCACGTAGTTG                   | 5'- FAM- ATGAGCATGGCATCGACCCAGC-BHQ1-3'                                              |
| <b>Genes of AIPL1-interacting proteins according to STRING</b> |                                   |                                           |                                                                                      |
| AIPL1                                                          | 5'- GTGGCTGAAGCTGGAGAAG-3'        | 5'-            CTCCAGCTCCAGCACTTTC<br>-3' | WT: 5'-FAM- AGTGCCTGCTGAAGAAGGAG-BHQ1-3'<br>OPT: 5'-FAM- CAACACCCTGATCCTGAAC BHQ1-3' |
| NUB1                                                           | 5'- TCAGAGACTGGTCCACATAAAAG-3'    | 5'- AGCTGACGTGCCTTGTTAAG-3'               | 5'- FAM- TCCACTGTGATAGTTTCGGATCCCTTGA-<br>BHQ1-3'                                    |
| AHR                                                            | 5'- CCAACATCACCTACGCCAG-3'        | 5'- CCAAACGGTCCAACCTCTGTAT-3'             | 5'- FAM- CGGTGCAGAAAACGTAAAGCCAATCC-<br>BHQ1-3'                                      |
| LCA5                                                           | 5'- TCTAATCGTCTGCCAAAGTCC-3'      | 5'- TCTGGCTGAAGTCTTCCATG-3'               | 5'- FAM- TGTACACAGGTCTGCAAAATCACTCTGG-<br>BHQ1-3'                                    |
| <b>Transcription factors</b>                                   |                                   |                                           |                                                                                      |
| KLF4                                                           | 5'- ACCAGGCACTACCGTAAACACA-3'     | 5'- GGTCCGACCTGGAAAATGCT-3'               | 5'-            FAM-            CCAGTGCCAAAAATGCGACCG<br>-BHQ1-3'                     |

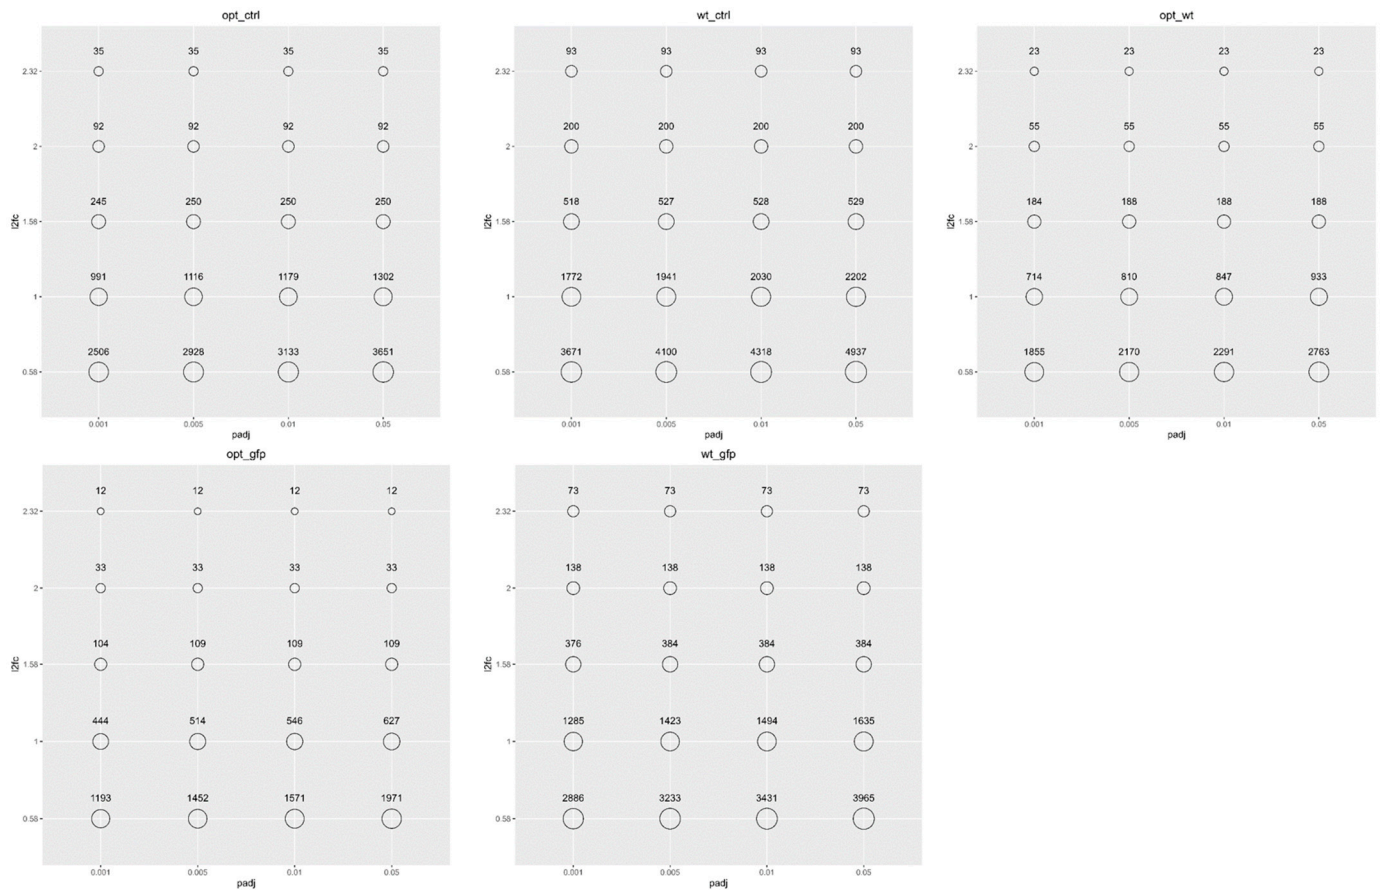

**Supplementary Figure S2.** Numbers of differentially expressed genes with various thresholds (p-value adjusted and fold change).

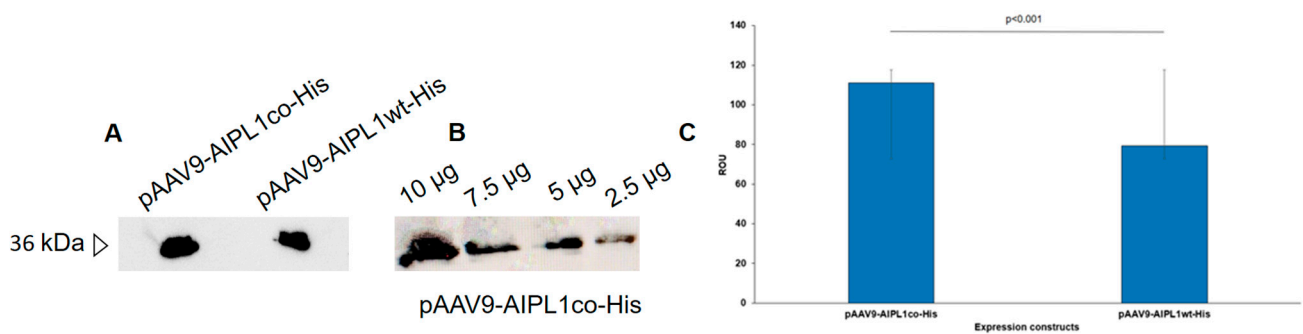

**Supplementary Figure S3.** Analysis of AIPL1 expression. AIPL1 gene product was detected by western blot using HEK293T cells transfected with pAAV-AIPL1co-His and pAAV-AIPL1wt-His plasmids. AIPL1 protein specific band at 36 kDa was detected in cell lysates with anti-His antibodies (A). Various amount of HEK293T cell lysate was loaded in SDS-PAGE (B). Relative optical density units (RDU) of protein specific bands were calculated and plotted in a graph to visualize the difference between pAAV-AIPL1co-His and pAAV-AIPL1wt-His transfected cells (C). AAV-AIPL1co-His showed 1.39 time increase of overall protein product compared to pAAV-AIPL1wt-His transfected HEK-293T cells.

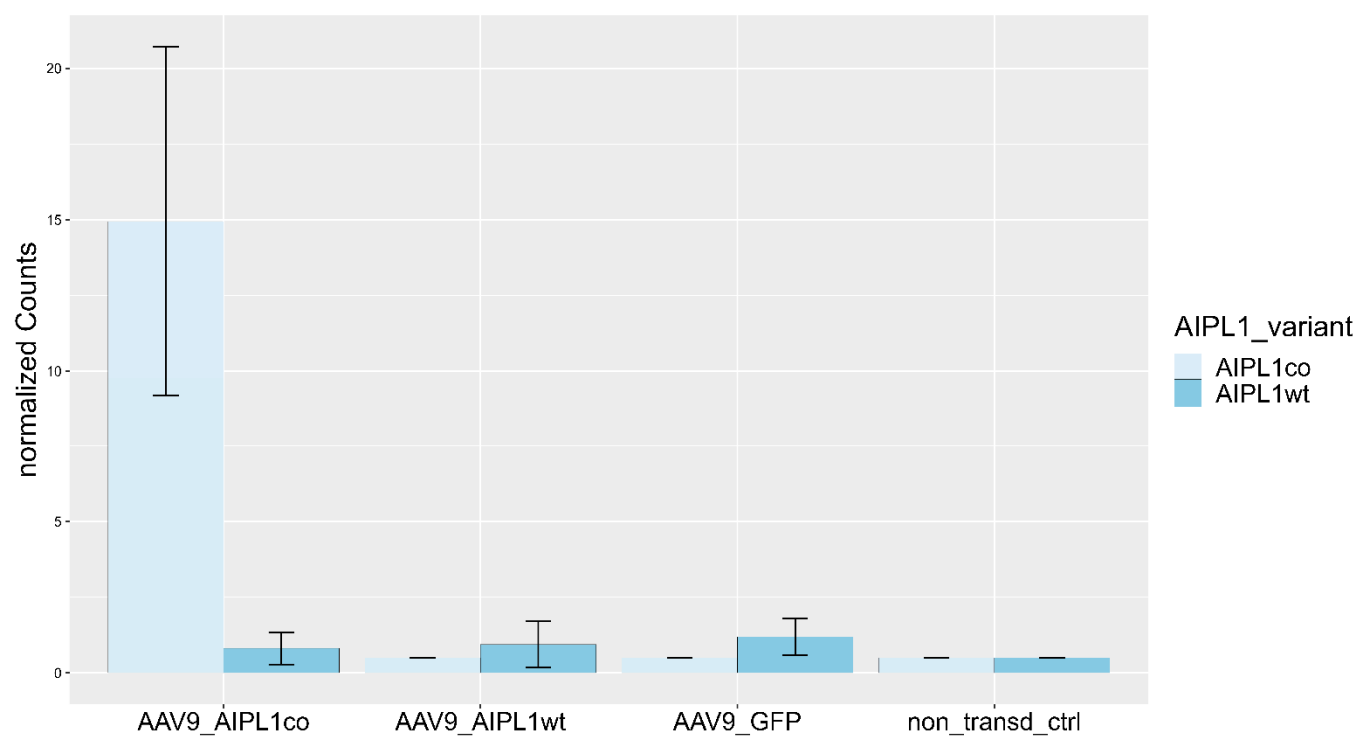

**Supplementary Figure S4.** RNA-sequencing normalized *AIPL1* gene variants counts. Error bars represent standard deviation between replicates within sample groups.
